# Supplementary material for: Dietary Isorhamnetin Intake Is Inversely Associated with Coronary Artery Disease Occurrence in Polish Adults
Source: MDPI journal article supplement (doi:10.3390/ijerph191912546), 2022-10-01
Supplement: s1 [file s1]

## **Categories and subcategories of products**

### **Fruits**

**Citrus fruits** (Lemon, White grapefruit, Red grapefruit, Orange)

**Exotics fruits** (Pineapple, Banana, Date, Fig, Kiwi, Mango, Melon, Dark grapes, White grapes)

**Seed fruits** (Cherries, Plum, Peach, Apricot, Nectarine)

**Local fruits** (Pear, Apple)

**Berries** (Gooseberry, Chokeberry, White currant, Blueberry, Lingonberry, Black currant, Elderberry, Red currant, Goji berries, Blackberries, Raspberries, White mulberry, Strawberries, Cranberries - fresh)

**Dried fruits** (Dried cranberries, Prunes, Raisins)

### **Vegetables**

**Lettuce** (Iceberg lettuce, Butterhead lettuce, Radicchio lettuce, Chicory, Endive, Watercress, Rocket)

**Other leafy vegetables** (Dock, Spinach, Beet leaves, Radish leaves)

**Solanaceous vegetables** (Aubergine, Zucchini, Cucumber, Cherry tomatoes, Tomatoes, Canned tomatoes, Asparagus)

**Roots and tubers** (Sweet potatoes, Beetroot, Ginger, Turnip, Celeriac, Celery, Fennel, Carrot, Potatoes, Horseradish, Parsnip)

**Peppers** (Jalapeno pepper, Red pepper, Green pepper, Yellow pepper)

**Cabbage** (Cabbage, Red cabbage, Sauerkraut, Kale, Brussels sprout, Broccoli, Cauliflower)

**Onions** (White onion, Red onion, Garlic, Leek)

**Sprouts** (Alfalfa shoots, Radish shoots, Cress)

**Legumes** (White beans, Red beans, String bean, Peas, Broad beans, Tofu)

**Nuts and seeds** (Pistacchio, Almonds, Chia seeds)

**Herbs and spices** (Coriander, Dill, Lovage, Apple vinegar, Oregano, Parsley, Chives, Caper)

**Sauces** (Ketchup)

### **Jam and honey**

**Jam** (Cranberry jam, Peach jam, Raspberry jam, Strawberry jam, Plum jam)

**Honey** (Honey)

**Wholegrain** (Buckwheat groats, Buckwheat bran)

**Cocoa** (Cocoa, Hot chocolate powder, Carob)

### **Tea and coffee**

**Tea** (Black tea, Green tea)

**Coffee** (Coffee)

**Other non-alcoholic beverages (juices)** (Elderberry juice concentrate, Lemon juice, Black currant juice, Grapefruit juice, Apple juice, Orange juice, Tomato juice, Multifruit juice, Grape juice, Cherry juice, Pomegranate juice, Cranberry juice)

### **Alcoholic beverages**

**Wine** (Champagne, Red fruit wine, Red dry wine Cabernet Sauvignon, Red dry wine Shiraz, Red table wine, Sweet dessert wine, White fruit wine, White table wine)

**Beer** (Beer)
