# Supplementary material for: Dietary Isorhamnetin Intake Is Inversely Associated with Coronary Artery Disease Occurrence in Polish Adults
Source: MDPI journal article supplement (doi:10.3390/ijerph191912546), 2022-10-01
Supplement: s1 [file s1]

## FOOD FREQUENCY QUESTIONNAIRE

| Product                       | Portion size<br>[gram] |     | Never or<br>almost<br>never | 1 portion<br>per month | Few portions per<br>month – if so,<br>please give the<br>numer of<br>portions per<br>month? | 1<br>portion<br>per<br>week | Few portions<br>per week – if<br>so, please give<br>the numer of<br>portions per<br>week? | 1 portion<br>per day | Few portions<br>per day – if so,<br>please give the<br>numer of<br>portions per<br>day? |
|-------------------------------|------------------------|-----|-----------------------------|------------------------|---------------------------------------------------------------------------------------------|-----------------------------|-------------------------------------------------------------------------------------------|----------------------|-----------------------------------------------------------------------------------------|
| <b>Vegetables and legumes</b> |                        |     |                             |                        |                                                                                             |                             |                                                                                           |                      |                                                                                         |
| Aubergine                     | a piece                | 240 |                             |                        |                                                                                             |                             |                                                                                           |                      |                                                                                         |
| Sweet potatoes                | a piece                | 230 |                             |                        |                                                                                             |                             |                                                                                           |                      |                                                                                         |
| Beet leaves                   | a bunch                | 280 |                             |                        |                                                                                             |                             |                                                                                           |                      |                                                                                         |
| Broad beans                   | a handful              | 80  |                             |                        |                                                                                             |                             |                                                                                           |                      |                                                                                         |
| Broccoli                      | a portion              | 100 |                             |                        |                                                                                             |                             |                                                                                           |                      |                                                                                         |
| Brussels sprout               | a portion              | 200 |                             |                        |                                                                                             |                             |                                                                                           |                      |                                                                                         |
| Beetroot                      | a piece                | 105 |                             |                        |                                                                                             |                             |                                                                                           |                      |                                                                                         |
| White onion                   | a piece                | 105 |                             |                        |                                                                                             |                             |                                                                                           |                      |                                                                                         |
| Red onion                     | a piece                | 105 |                             |                        |                                                                                             |                             |                                                                                           |                      |                                                                                         |
| Zucchini                      | a piece                | 600 |                             |                        |                                                                                             |                             |                                                                                           |                      |                                                                                         |
| Chicory                       | a piece                | 70  |                             |                        |                                                                                             |                             |                                                                                           |                      |                                                                                         |
| Garlic                        | a clove                | 5   |                             |                        |                                                                                             |                             |                                                                                           |                      |                                                                                         |
| Endive                        | a piece                | 80  |                             |                        |                                                                                             |                             |                                                                                           |                      |                                                                                         |
| White beans                   | a glass                | 190 |                             |                        |                                                                                             |                             |                                                                                           |                      |                                                                                         |
| Red beans                     | a glass                | 190 |                             |                        |                                                                                             |                             |                                                                                           |                      |                                                                                         |
| String bean (green)           | a portion              | 200 |                             |                        |                                                                                             |                             |                                                                                           |                      |                                                                                         |
| String bean (yellow)          | a portion              | 200 |                             |                        |                                                                                             |                             |                                                                                           |                      |                                                                                         |
| Peas                          | a spoon                | 15  |                             |                        |                                                                                             |                             |                                                                                           |                      |                                                                                         |
| Ginger                        | a piece                | 10  |                             |                        |                                                                                             |                             |                                                                                           |                      |                                                                                         |
| Kale                          | a handful              | 20  |                             |                        |                                                                                             |                             |                                                                                           |                      |                                                                                         |
| Cauliflower                   | a portion              | 200 |                             |                        |                                                                                             |                             |                                                                                           |                      |                                                                                         |
| Turnip                        | a piece                | 165 |                             |                        |                                                                                             |                             |                                                                                           |                      |                                                                                         |
| Caper                         | a spoon                | 10  |                             |                        |                                                                                             |                             |                                                                                           |                      |                                                                                         |
| Cabbage                       | a glass                | 110 |                             |                        |                                                                                             |                             |                                                                                           |                      |                                                                                         |
| Red cabbage                   | a glass                | 110 |                             |                        |                                                                                             |                             |                                                                                           |                      |                                                                                         |
| Sauerkraut                    | a glass                | 110 |                             |                        |                                                                                             |                             |                                                                                           |                      |                                                                                         |
| Alfalfa shoots                | a spoon                | 8   |                             |                        |                                                                                             |                             |                                                                                           |                      |                                                                                         |
| Radish shoots                 | a spoon                | 8   |                             |                        |                                                                                             |                             |                                                                                           |                      |                                                                                         |
| Fennel                        | a piece                | 350 |                             |                        |                                                                                             |                             |                                                                                           |                      |                                                                                         |
| Radish leaves                 | a handful              | 15  |                             |                        |                                                                                             |                             |                                                                                           |                      |                                                                                         |
| Carrot                        | a piece                | 45  |                             |                        |                                                                                             |                             |                                                                                           |                      |                                                                                         |
| Cucumber                      | a piece                | 35  |                             |                        |                                                                                             |                             |                                                                                           |                      |                                                                                         |
| Jalapeno pepper               | a piece                | 4   |                             |                        |                                                                                             |                             |                                                                                           |                      |                                                                                         |
| Red pepper                    | a piece                | 230 |                             |                        |                                                                                             |                             |                                                                                           |                      |                                                                                         |
| Green pepper                  | a piece                | 140 |                             |                        |                                                                                             |                             |                                                                                           |                      |                                                                                         |
| Yellow pepper                 | a piece                | 200 |                             |                        |                                                                                             |                             |                                                                                           |                      |                                                                                         |
| Parsnip                       | a piece                | 170 |                             |                        |                                                                                             |                             |                                                                                           |                      |                                                                                         |
| Cherry tomatoes               | a handful              | 100 |                             |                        |                                                                                             |                             |                                                                                           |                      |                                                                                         |
| Tomatoes                      | a piece                | 170 |                             |                        |                                                                                             |                             |                                                                                           |                      |                                                                                         |
| Canned tomatoes               | a can                  | 400 |                             |                        |                                                                                             |                             |                                                                                           |                      |                                                                                         |
| Leek                          | a piece                | 50  |                             |                        |                                                                                             |                             |                                                                                           |                      |                                                                                         |
| Watercress                    | a handful              | 45  |                             |                        |                                                                                             |                             |                                                                                           |                      |                                                                                         |
| Rocket                        | a handful              | 20  |                             |                        |                                                                                             |                             |                                                                                           |                      |                                                                                         |
| Cress                         | a handful              | 10  |                             |                        |                                                                                             |                             |                                                                                           |                      |                                                                                         |

|                    |            |     |  |  |  |  |  |  |  |
|--------------------|------------|-----|--|--|--|--|--|--|--|
| Iceberg lettuce    | a leaf     | 40  |  |  |  |  |  |  |  |
| Butterhead lettuce | a leaf     | 5   |  |  |  |  |  |  |  |
| Radicchio lettuce  | a leaf     | 35  |  |  |  |  |  |  |  |
| Celeriac           | a slice    | 60  |  |  |  |  |  |  |  |
| Celery             | a piece    | 45  |  |  |  |  |  |  |  |
| Dock               | a handful  | 70  |  |  |  |  |  |  |  |
| Asparagus          | a piece    | 30  |  |  |  |  |  |  |  |
| Spinach            | a handful  | 25  |  |  |  |  |  |  |  |
| Tofu               | a slice    | 16  |  |  |  |  |  |  |  |
| Horseradish        | a teaspoon | 10  |  |  |  |  |  |  |  |
| Potatoes           | a piece    | 75  |  |  |  |  |  |  |  |
| Fruits and jams    |            |     |  |  |  |  |  |  |  |
| Gooseberry         | a handful  | 50  |  |  |  |  |  |  |  |
| Pineapple          | a slice    | 80  |  |  |  |  |  |  |  |
| Chokeberry         | a handful  | 45  |  |  |  |  |  |  |  |
| Banana             | a piece    | 120 |  |  |  |  |  |  |  |
| White currant      | a handful  | 60  |  |  |  |  |  |  |  |
| Blueberry          | a handful  | 50  |  |  |  |  |  |  |  |
| Lingonberry        | a handful  | 50  |  |  |  |  |  |  |  |
| Peach              | a piece    | 85  |  |  |  |  |  |  |  |
| Lemon              | a slice    | 10  |  |  |  |  |  |  |  |
| Black currant      | a handful  | 40  |  |  |  |  |  |  |  |
| Elderberry         | a portion  | 100 |  |  |  |  |  |  |  |
| Red currant        | a handful  | 45  |  |  |  |  |  |  |  |
| Date               | a piece    | 5   |  |  |  |  |  |  |  |
| Peach jam          | a teaspoon | 10  |  |  |  |  |  |  |  |
| Raspberry jam      | a teaspoon | 10  |  |  |  |  |  |  |  |
| Strawberry jam     | a teaspoon | 10  |  |  |  |  |  |  |  |
| Fig                | a piece    | 70  |  |  |  |  |  |  |  |
| White grapefruit   | a piece    | 260 |  |  |  |  |  |  |  |
| Red grapefruit     | a piece    | 260 |  |  |  |  |  |  |  |
| Pear               | a piece    | 130 |  |  |  |  |  |  |  |
| Apple              | a piece    | 180 |  |  |  |  |  |  |  |
| Goji berries       | a spoon    | 8   |  |  |  |  |  |  |  |
| Blackberries       | a handful  | 65  |  |  |  |  |  |  |  |
| Kiwi               | a piece    | 75  |  |  |  |  |  |  |  |
| Rapsberries        | a handful  | 70  |  |  |  |  |  |  |  |
| Mango              | a piece    | 280 |  |  |  |  |  |  |  |
| Melon              | a piece    | 630 |  |  |  |  |  |  |  |
| Apricot            | a piece    | 45  |  |  |  |  |  |  |  |
| White mulberry     | a handful  | 30  |  |  |  |  |  |  |  |
| Nectarine          | a piece    | 115 |  |  |  |  |  |  |  |
| Orange             | a piece    | 240 |  |  |  |  |  |  |  |
| Plum jam           | a teaspoon | 10  |  |  |  |  |  |  |  |
| Prunes             | a piece    | 7   |  |  |  |  |  |  |  |
| Plum               | a piece    | 20  |  |  |  |  |  |  |  |
| Strawberries       | a handful  | 70  |  |  |  |  |  |  |  |
| Dark grapes        | a handful  | 70  |  |  |  |  |  |  |  |
| White grapes       | a handful  | 70  |  |  |  |  |  |  |  |
| Cherries           | a handful  | 70  |  |  |  |  |  |  |  |
| Dried cranberries  | a spoon    | 12  |  |  |  |  |  |  |  |

|                                   |             |     |  |  |  |  |  |  |  |
|-----------------------------------|-------------|-----|--|--|--|--|--|--|--|
| Cranberry jam                     | a spoon     | 25  |  |  |  |  |  |  |  |
| Cranberries (fresh)               | a handful   | 50  |  |  |  |  |  |  |  |
| Herbs, spices and sauces          |             |     |  |  |  |  |  |  |  |
| Honey                             | a teaspoon  | 12  |  |  |  |  |  |  |  |
| Carob                             | a spoon     | 12  |  |  |  |  |  |  |  |
| Ketchup                           | a spoon     | 20  |  |  |  |  |  |  |  |
| Coriander                         | a handful   | 1   |  |  |  |  |  |  |  |
| Dill                              | a teaspoon  | 4   |  |  |  |  |  |  |  |
| Lovage                            | a teaspoon  | 6   |  |  |  |  |  |  |  |
| Almonds                           | a spoon     | 15  |  |  |  |  |  |  |  |
| Chia seeds                        | a spoon     | 10  |  |  |  |  |  |  |  |
| Apple vinegar                     | a spoon     | 5   |  |  |  |  |  |  |  |
| Oregano (dried)                   | a teaspoon  | 4   |  |  |  |  |  |  |  |
| Oregano (fresh)                   | a handful   | 3   |  |  |  |  |  |  |  |
| Parsley (fresh)                   | a teaspoon  | 6   |  |  |  |  |  |  |  |
| Parsley (dried)                   | a teaspoon  | 6   |  |  |  |  |  |  |  |
| Pistacchio                        | a spoon     | 9   |  |  |  |  |  |  |  |
| Raisins                           | a spoon     | 15  |  |  |  |  |  |  |  |
| Chives                            | a spoon     | 5   |  |  |  |  |  |  |  |
| Wholegrains                       |             |     |  |  |  |  |  |  |  |
| Buckwheat groats                  | a bag       | 100 |  |  |  |  |  |  |  |
| Buckwheat bran                    | a spoon     | 8   |  |  |  |  |  |  |  |
| Beverages                         |             |     |  |  |  |  |  |  |  |
| Black tea                         | a glass     | 250 |  |  |  |  |  |  |  |
| Green tea                         | a glass     | 250 |  |  |  |  |  |  |  |
| Coffee                            | a cup       | 125 |  |  |  |  |  |  |  |
| Cocoa                             | a spoon     | 10  |  |  |  |  |  |  |  |
| Hot chocolate (powder)            | a spoon     | 10  |  |  |  |  |  |  |  |
| Elderberry juice concentrate      | a teaspoon  | 5   |  |  |  |  |  |  |  |
| Lemon juice                       | a spoon     | 6   |  |  |  |  |  |  |  |
| Black currant juice               | a glass     | 250 |  |  |  |  |  |  |  |
| Grapefruit juice                  | a glass     | 250 |  |  |  |  |  |  |  |
| Apple juice                       | a glass     | 250 |  |  |  |  |  |  |  |
| Orange juice                      | a glass     | 250 |  |  |  |  |  |  |  |
| Tomato juice                      | a glass     | 250 |  |  |  |  |  |  |  |
| Multifruit juice                  | a glass     | 250 |  |  |  |  |  |  |  |
| Grape juice                       | a glass     | 250 |  |  |  |  |  |  |  |
| Cherry juice                      | a glass     | 250 |  |  |  |  |  |  |  |
| Pomegranate juice                 | a glass     | 250 |  |  |  |  |  |  |  |
| Cranberry juice                   | a glass     | 250 |  |  |  |  |  |  |  |
| Beer                              | a big glass | 500 |  |  |  |  |  |  |  |
| Champagne                         | a glass     | 100 |  |  |  |  |  |  |  |
| Red fruit wine                    | a glass     | 150 |  |  |  |  |  |  |  |
| Red dry wine (Cabernet Sauvignon) | a glass     | 150 |  |  |  |  |  |  |  |
| Red dry wine (Shiraz)             | a glass     | 150 |  |  |  |  |  |  |  |
| Red table wine                    | a glass     | 150 |  |  |  |  |  |  |  |
| Sweet dessert wine                | a glass     | 150 |  |  |  |  |  |  |  |
| White fruit wine                  | a glass     | 150 |  |  |  |  |  |  |  |
| White table wine                  | a glass     | 150 |  |  |  |  |  |  |  |

Do you take any supplements, if so please enumerate them (name, dose)?
